1 **Genome-wide by environment interaction studies (GWEIS) of depressive symptoms**  
2 **and psychosocial stress in UK Biobank and Generation Scotland.**

3

4 Running title: **GWEIS of depressive symptoms in UK**

5

6 Aleix Arnau-Soler<sup>1</sup>, Erin Macdonald-Dunlop<sup>2</sup>, Mark J. Adams<sup>3</sup>, Toni-Kim Clarke<sup>3</sup>,  
7 Donald J. MacIntyre<sup>3</sup>, Keith Milburn<sup>4</sup>, Lauren Navrady<sup>3</sup>, Generation Scotland<sup>5</sup>, Major  
8 Depressive Disorder Working Group of the Psychiatric Genomics Consortium<sup>6</sup>,  
9 Caroline Hayward<sup>7</sup>, Andrew M. McIntosh<sup>3</sup>, Pippa A. Thomson<sup>1</sup>

10

11 <sup>1</sup> Medical Genetics Section, University of Edinburgh, Centre for Genomic and Experimental Medicine  
12 and MRC Institute of Genetics and Molecular Medicine, Edinburgh, UK

13 <sup>2</sup> Centre for Global Health Research, Usher Institute of Population Health Sciences and Informatics,  
14 University of Edinburgh, Teviot Place, Edinburgh, UK.

15 <sup>3</sup> Division of Psychiatry, Deanery of Clinical Sciences, University of Edinburgh, Royal Edinburgh Hospital,  
16 Morningside Park, Edinburgh EH10 5HF, UK

17 <sup>4</sup> Health Informatics Centre, University of Dundee, UK.

18 <sup>5</sup> A collaboration between the University Medical School and NHS in Aberdeen, Dundee, Edinburgh and  
19 Glasgow, Scotland, UK

20 <sup>6</sup> For a full list of MDD working group of the PGC investigators, see the Supplementary Material.

21 <sup>7</sup> Medical Research Council Human Genetics Unit, Institute of Genetics and Molecular Medicine,  
22 University of Edinburgh, Edinburgh, UK

23

24 Correspondence should be addressed to: P. Thomson ([Pippa.Thomson@ed.ac.uk](mailto:Pippa.Thomson@ed.ac.uk)) or A.  
25 Arnau-Soler ([aleix.arnau.soler@igmm.ed.ac.uk](mailto:aleix.arnau.soler@igmm.ed.ac.uk)).

26

27 Centre for Genomic and Experimental Medicine

28 Institute of Genetics and Molecular Medicine

29 University of Edinburgh

30 Western General Hospital

31 Crewe Road South

32 Edinburgh, EH4 2XU, UK

33 Phone: +44(0)1316518756

34

35 Abstract: 250

36 Main body (excl. abstract): 5 000

37 No. Tables: 1

38 No. Figures: 3

39 No. References: 100

40 Supplementary Material: 2 files

41       Supplementary Figures: 17

42       Supplementary Tables: 17

## 43 **ABSTRACT**

44 Stress is associated with poorer physical and mental health. To improve our  
45 understanding of this link, we performed genome-wide association studies (GWAS) of  
46 depressive symptoms and genome-wide by environment interaction studies (GWEIS)  
47 of depressive symptoms and stressful life events (SLE) in two UK population cohorts  
48 (Generation Scotland and UK Biobank). No SNP was individually significant in either  
49 GWAS, but gene-based tests identified six genes associated with depressive  
50 symptoms in UK Biobank (*DCC*, *ACSS3*, *DRD2*, *STAG1*, *FOXP2* and *KYNU*;  $p < 2.77 \times 10^{-6}$ ).  
51 Two SNPs with genome-wide significant GxE effects were identified by GWEIS in  
52 Generation Scotland: rs12789145 (53kb downstream *PIWIL4*;  $p = 4.95 \times 10^{-9}$ ; total SLE)  
53 and rs17070072 (intronic to *ZCCHC2*;  $p = 1.46 \times 10^{-8}$ ; dependent SLE). A third locus  
54 upstream *CYLC2* (rs12000047 and rs12005200,  $p < 2.00 \times 10^{-8}$ ; dependent SLE) when  
55 the joint effect of the SNP main and GxE effects was considered. GWEIS gene-based  
56 tests identified: *MTNR1B* with GxE effect with dependent SLE in Generation Scotland;  
57 and *PHF2* with the joint effect in UK Biobank ( $p < 2.77 \times 10^{-6}$ ). Polygenic risk scores  
58 (PRS) analyses incorporating GxE effects improved the prediction of depressive  
59 symptom scores, when using weights derived from either the UK Biobank GWAS of  
60 depressive symptoms ( $p = 0.01$ ) or the PGC GWAS of major depressive disorder ( $p =$   
61  $5.91 \times 10^{-3}$ ). Using an independent sample, PRS derived using GWEIS GxE effects  
62 provided evidence of shared aetiologies between depressive symptoms and  
63 schizotypal personality, heart disease and COPD. Further such studies are required  
64 and may result in improved treatments for depression and other stress-related  
65 conditions.

66

## 67 INTRODUCTION

68 Mental illness results from the interplay between genetic susceptibility and  
69 environmental risk factors<sup>1,2</sup>. Previous studies have shown that the effects of  
70 environmental factors on traits may be partially heritable<sup>3</sup> and moderated by  
71 genetics<sup>4,5</sup>. Major depressive disorder (MDD) is the most common psychiatric  
72 disorder with a lifetime prevalence of approximately 14% globally<sup>6</sup> and with a  
73 heritability of approximately 37%<sup>7</sup>. There is strong evidence for the role of stressful  
74 life events (SLE) as risk factor and trigger for depression<sup>8-12</sup>. Genetic control of  
75 sensitivity to stress may vary between individuals, resulting in individual differences  
76 in the depressogenic effects of SLE, i.e., genotype-by-environment interaction  
77 (GxE)<sup>4,13-16</sup>. Significant evidence of GxE has been reported for common respiratory  
78 diseases and some forms of cancer<sup>17-22</sup>, and GxE studies have identified genetic risk  
79 variants not found by genome-wide association studies (GWAS)<sup>23-27</sup>.

80 Interaction between polygenic risk of MDD and recent SLE are reported to increase  
81 liability to depressive symptoms<sup>4,16</sup>; validating the implementation of genome-wide  
82 approaches to study GxE in depression. Most GxE studies for MDD have been  
83 conducted on candidate genes, or using polygenic approaches to a wide range of  
84 environmental risk factors, with some contradictory findings<sup>28-32</sup>. Incorporating  
85 knowledge about recent SLE into GWAS may improve our ability to detect risk  
86 variants in depression otherwise missed in GWAS<sup>33</sup>. To date, four studies have  
87 performed genome-wide by environment interaction studies (GWEIS) of MDD and  
88 SLE<sup>34-37</sup>, but this is the first study to perform GWEIS of depressive symptoms using  
89 adult SLE in cohorts of relatively homogeneous European ancestry.

90 Interpretation of GxE effects may be hindered by gene-environment correlation.  
91 Gene-environment correlation denotes a genetic mediation of associations through  
92 genetic influences on exposure to, or reporting of, environments<sup>2,38</sup>. Genetic factors  
93 predisposing to MDD may contribute to exposure and/or reporting of SLE<sup>39</sup>. To tackle  
94 this limitation, measures of SLE can be broken down into SLE likely to be independent  
95 of a respondent's own behaviour and symptoms, or into dependent SLE, in which  
96 participants may played an active role exposure to SLE<sup>40,41</sup>. Different genetic  
97 influences with a higher heritability for reported dependent SLE than independent  
98 SLE<sup>39,42-45</sup> suggest that whereas GxE driven by independent SLE is likely to reflect a  
99 genetic moderation of associations between SLE and depression, GxE driven by  
100 dependent SLE may result from a genetic mediation of the association through  
101 genetically driven personality or behavioural traits. To test this we analysed  
102 dependent and independent SLE scores separately in Generation Scotland.  
103 Stress contributes to many human conditions, with evidence of genetic vulnerability  
104 to the effect of SLE<sup>46</sup>. Therefore, genetic stress-response factors in MDD may also  
105 underlie the aetiology of other stress-linked disorders, with which MDD is often co-  
106 morbid<sup>47,48</sup> (e.g. cardiovascular diseases<sup>49</sup>, diabetes,<sup>50</sup> chronic pain<sup>51</sup> and  
107 inflammation<sup>52</sup>). We tested the hypothesis that pleiotropy and shared aetiology  
108 between mental and physical health conditions may be due in part to genetic variants  
109 underlying SLE effects in depression.  
110 In this study we conduct GWEIS of depressive symptoms incorporating data on SLE in  
111 two independent UK-based cohorts. We aimed to: i) identify loci associated with  
112 depressive symptoms through genetic response to SLE; ii) study dependent and  
113 independent SLE to support a contribution of genetically mediated exposure to

114 stress; iii) assess whether GxE effects improve the proportion of phenotypic variance  
115 in depressive symptoms explained by genetic additive main effects alone; and iv) test  
116 for a significant overlap in the genetic aetiology of the response to SLE and mental  
117 and physical stress-related phenotypes.  
118

## 119 MATERIALS & METHODS

120 The core workflow of this study is summarized at Figure 1.

121

### 122 COHORT DESCRIPTIONS

123 **Generation Scotland (GS).** Generation Scotland is a family-based population cohort  
124 representative of the Scottish population<sup>53</sup>. At baseline, blood and salivary DNA  
125 samples were collected, stored and genotyped at the Wellcome Trust Clinical  
126 Research Facility, Edinburgh. Genome-wide genotype data was generated using the  
127 Illumina HumanOmniExpressExome-8 v1.0 DNA Analysis BeadChip (San Diego, CA,  
128 USA) and Infinium chemistry<sup>54</sup>. The procedures and details for DNA extraction and  
129 genotyping have been extensively described elsewhere<sup>55,56</sup>. 21 525 participants were  
130 re-contacted to participate in a follow-up mental health study (Stratifying Resilience  
131 and Depression Longitudinally, STRADL), of which 8 541 participants responded  
132 providing updated measures in psychiatric symptoms and SLE through self-reported  
133 mental health questionnaires<sup>57</sup>. Samples were excluded if: they were duplicate  
134 samples, had diagnoses of bipolar disorder, no SLE data (non-respondents), were  
135 population outliers (mainly non-Caucasians and Italian ancestry subgroup), had sex  
136 mismatches, or were missing more than 2% of genotypes. SNPs were excluded if:  
137 missing more than 2% of genotypes, Hardy-Weinberg Equilibrium test  $p < 1 \times 10^{-6}$ , or  
138 minor allele frequency less than 1%. Further details of the GS and STRADL cohort are  
139 available elsewhere<sup>53,57-59</sup>. All components of GS and STRADL obtained ethical  
140 approval from the Tayside Committee on Medical Research Ethics on behalf of the  
141 NHS (reference 05/s1401/89). After quality control, individuals were filtered by  
142 degree of relatedness ( $\pi$ -hat < 0.05), maximizing retention of those individuals

143 reporting a higher number of SLE. The final dataset comprised data on 4 919  
144 unrelated individuals (1 929 men; 2 990 women) and 560 351 SNPs.

145 ***Independent GS datasets.*** Additional datasets for a range of stress-linked medical  
146 conditions and personality traits were created from GS (N = 21 525) excluding  
147 respondents and their relatives (N = 5 724). Following the same quality control  
148 criteria detailed above, we maximized unrelated non-respondents for retention of  
149 cases, or proxy cases (see below), to maximize the information available for each  
150 phenotype. This resulted in independent datasets with unrelated individuals for each  
151 trait. Differences between respondents and non-respondents are noted in the figure  
152 legend of Table 1.

153 ***UK Biobank (UKB).*** This study used data from 99 057 unrelated individuals (47 558  
154 men; 51 499 women) from the initial release of UKB genotyped data (released 2015;  
155 under UK Biobank project 4844.). Briefly, participants were removed based on UKB  
156 genomic analysis exclusion, non-white British ancestry, high missingness, genetic  
157 relatedness (kinship coefficient > 0.0442), QC failure in UK BiLEVE study, and gender  
158 mismatch. GS participants and their relatives were excluded and GS SNPs imputed to  
159 a reference set combining the UK10K haplotype and 1000 Genomes Phase 3  
160 reference panels<sup>60</sup>. After quality control, 1 009 208 SNPs remained. UK Biobank  
161 received ethical approval from the NHS National Research Ethics Service North West  
162 (reference: 11/NW/0382). Further details on UKB cohort description, genotyping,  
163 imputation and quality control are available elsewhere<sup>61-63</sup>.  
164 All participants provided informed consent.

165

166 **PHENOTYPE ASSESSMENT**

167 **Stressful life events (SLE).** GS participants reported SLE experienced over the  
168 preceding 6 months through a self-reported brief life events questionnaire based on  
169 the 12-item List of Threatening Experiences<sup>40,64,65</sup> (Supplementary Table 1a). The total  
170 number of SLE reported (TSLE) consisted of the number of ‘yes’ responses. TSLE were  
171 subdivided into SLE potentially dependent or secondary to an individual’s own  
172 behaviour (DSLE, questions 6-11 in Supplementary Table 1a), and independent SLE  
173 (ISLE, questions 1-5 in Supplementary Table 1a; pregnancy item removed) following  
174 Brugha *et al.*<sup>40,41</sup>. Thus, 3 SLE measures (TSLE, DSLE and ISLE) were constructed for GS.  
175 UKB participants were screened for “*illness, injury, bereavement and stress*”  
176 (Supplementary Table 1b) over the previous 2 years using 6 items included in the UKB  
177 Touchscreen questionnaire. A score reflecting SLE reported in UKB (TSLE<sub>UKB</sub>) was  
178 constructed by summing the number of ‘yes’ responses.

179 **Psychological assessment.** GS participants reported whether their current mental  
180 state over the preceding 2 weeks differed from their typical state using a self-  
181 administered 28-item scaled version of The General Health Questionnaire (GHQ)<sup>66-68</sup>.  
182 Participants rated the degree and severity of their current symptoms with a four-  
183 point Likert scale (following Goldberg *et al.*, 1997<sup>68</sup>). A final log-transformed GHQ was  
184 used to detect altered psychopathology and thus, assess depressive symptoms as  
185 results of SLE. In UKB participants, current depressive symptoms over the preceding 2  
186 weeks were evaluated using 4 psychometric screening items (Supplementary Table  
187 2), including two validated and reliable questions for screening depression<sup>69</sup>, from the  
188 Patient Health Questionnaire (PHQ) validated to screen mental illness<sup>70,71</sup>. Each  
189 question was rated in a four-point Likert scale to assess impairment/severity of



190 symptoms. Due to its skewed distribution, a four-point PHQ score was formed from  
191 PHQ (0 = 0; 1 = 1-2; 2 = 3-5; 3 = 6 or more) to create a more normal distribution.  
192 ***Stress-related traits.*** Targeted GS stress-related phenotypes and sample sizes are  
193 shown in Table 1 and detailed elsewhere<sup>53</sup>. These conditions were selected from  
194 literature review based on previous evidence of a link with stress<sup>46</sup> (see also  
195 Supplementary Material: third section). Furthermore, we created additional  
196 independent samples using mapping by proxy, where individuals with a self-reported  
197 first-degree relative with a selected phenotype were included as proxy cases. This  
198 approach provides greater power to detect susceptibility variants in traits with low  
199 prevalence<sup>72</sup>.

200

## 201 **STATISTICAL ANALYSES**

202 ***SNP-heritability and genetic correlation.*** Restricted maximum likelihood approach  
203 was applied to estimate SNP-heritability ( $h^2_{\text{SNP}}$ ) of depressive symptoms and self-  
204 reported SLE measures, and within samples bivariate genetic correlation between  
205 depressive symptoms and SLE measures using GCTA<sup>73</sup>.

206 ***GWAS analyses.*** GWAS were conducted in PLINK<sup>74</sup>. In GS, age, sex and 20 principal  
207 components (PCs) were fitted as covariates. In UKB, age, sex, and 15 PCs  
208 recommended by UKB were fitted as covariates. The genome-wide significance  
209 threshold was  $p = 5 \times 10^{-8}$ .

210 ***GWEIS analyses.*** GWEIS were conducted on GHQ (the dependent variable) for TSLE,  
211 DSLE and ISLE in GS and on PHQ for TSLE<sub>UKB</sub> in UKB fitting the same covariates  
212 detailed above to reduce error variance. GWEIS were conducted using an R plugin for  
213 PLINK<sup>74</sup> developed by Almli *et al.*<sup>75</sup> (<https://epstein-software.github.io/robust-joint->

214 interaction). This method implements a robust test, that jointly considers SNP and  
215 SNP-environment interaction effects from a full model ( $Y \sim \beta_0 + \beta SNP + \beta SLE +$   
216  $\beta SNP \times SLE + \beta Covariates$ ) against a null model where both the SNP and SNP $\times$ SLE  
217 effects equal 0, to assess the joint effect (the combined additive main and G $\times$ E  
218 genetic effect at a SNP) using a nonlinear statistical approach that applies Huber-  
219 White estimates of variance to correct possible inflation due to heteroscedasticity  
220 (unequal variances across exposure levels). This robust test should reduce  
221 confounding due to differences in variance induced by covariate interaction effects<sup>76</sup>  
222 if present. Additional code was added (courtesy of Prof. Michael Epstein<sup>75</sup>;  
223 Supplementary Material) to generate beta-coefficients and the  $p$ -value of the G $\times$ E  
224 term alone. In UKB, correcting for 1 009 208 SNPs and 1 exposure we established a  
225 Bonferroni-adjusted threshold for significance at  $p = 2.47 \times 10^{-8}$  for both joint and G $\times$ E  
226 effects. In GS, correcting for 560 351 SNPs and 3 measures of SLE we established a  
227 genome-wide significance threshold of  $p = 2.97 \times 10^{-8}$ .

228 **Post-GWAS/GWEIS analyses.** GWAS and GWEIS summary statistics were analysed  
229 using FUMA<sup>77</sup> including: gene-based tests, functional annotation, gene prioritization  
230 and pathway enrichment (Supplementary Material).

231 **Polygenic profiling & prediction.** Polygenic risk scores (PRS) weighting by G $\times$ E effects  
232 (PRS<sub>G $\times$ E</sub>) were generated using PRSice-2<sup>78</sup> (Supplementary Material) in GS using G $\times$ E  
233 effects from UKB-GWEIS. In UKB, PRS<sub>G $\times$ E</sub> were constructed using G $\times$ E effects from all  
234 three GS-GWEIS (TSLE, DSLE and ISLE as exposures) independently. PRS were also  
235 weighted in both samples using either UKB-GWAS or GS-GWAS statistics (PRS<sub>D</sub>), and  
236 summary statistics from Psychiatric Genetic Consortium (PGC) MDD-GWAS (released  
237 2016; PRS<sub>MDD</sub>) that excluded GS and UKB individuals when required ( $N_{noGS} = 155\ 866$ ;

238  $N_{\text{noUKB}} = 138\,884$ ). Furthermore, we calculated PRS weighted by the joint effects (the  
239 combined additive main and GxE genetic effects;  $\text{PRS}_{\text{Joint}}$ ) from either the UKB-GWEIS  
240 or GS-GWEIS. PRS predictions of depressive symptoms were permuted 10 000 times.  
241 Multiple regression models fitting  $\text{PRS}_{\text{GxE}}$  and  $\text{PRS}_{\text{MDD}}$ , and both  $\text{PRS}_{\text{GxE}}$  and  $\text{PRS}_{\text{D}}$  were  
242 tested. All models were adjusted by same covariates used in GWAS/GWEIS. Null  
243 models were estimated from the direct effects of covariates alone. The predictive  
244 improvement of combining  $\text{PRS}_{\text{GxE}}$  and  $\text{PRS}_{\text{MDD}}/\text{PRS}_{\text{D}}$  effects over  $\text{PRS}_{\text{MDD}}/\text{PRS}_{\text{D}}$  effect  
245 alone was tested for significance using the likelihood-ratio test (LRT).  
246 Prediction of  $\text{PRS}_{\text{D}}$ ,  $\text{PRS}_{\text{GxE}}$  and  $\text{PRS}_{\text{Joint}}$  on stress-linked traits were adjusted by age, sex  
247 and 20 PCs; and permuted 10 000 times. Empirical- $p$ -values after permutations were  
248 further adjusted by false discovery rate (conservative threshold at *Empirical- $p$*  =  
249  $6.16 \times 10^{-3}$ ). The predictive improvement of fitting  $\text{PRS}_{\text{GxE}}$  combined with  $\text{PRS}_{\text{D}}$  and  
250 covariates over prediction of a phenotype using the  $\text{PRS}_{\text{D}}$  effect alone with covariates  
251 was assessed using LRT, and *LRT- $p$* -values adjusted by FDR (conservative threshold at  
252 *LRT- $p$*  =  $8.35 \times 10^{-4}$ ).  
253

## 254 RESULTS

255 **Phenotypic and genetic correlations.** Depressive symptoms scores and SLE measures  
256 were positively correlated in both UKB ( $r^2 = 0.22$ ,  $p < 2.2 \times 10^{-16}$ ) and GS (TSLE- $r^2 = 0.21$ ,  
257  $p = 1.69 \times 10^{-52}$ ; DSLE- $r^2 = 0.21$ ,  $p = 8.59 \times 10^{-51}$ ; ISLE- $r^2 = 0.17$ ,  $p = 2.33 \times 10^{-33}$ ). Significant  
258 bivariate genetic correlation between depression and SLE scores was identified in  
259 UKB ( $r_G = 0.72$ ;  $p < 1 \times 10^{-5}$ ,  $N = 50\,000$ ), but not in GS ( $r_G = 1$ ,  $p \geq 0.056$ ,  $N = 4\,919$ ;  
260 Supplementary Table 3a).

261 **SNP-heritability ( $h^2_{\text{SNP}}$ ).** In UKB, a significant  $h^2_{\text{SNP}}$  of PHQ was identified ( $h^2_{\text{SNP}} =$   
262  $0.090$ ;  $p < 0.001$ ;  $N = 99\,057$ ). This estimate remained significant after adjusting by  
263 TSLE<sub>UKB</sub> effect ( $h^2_{\text{SNP}} = 0.079$ ;  $p < 0.001$ ), suggesting a genetic contribution unique of  
264 depressive symptoms. The  $h^2_{\text{SNP}}$  of TSLE<sub>UKB</sub> was also significant ( $h^2_{\text{SNP}} = 0.040$ ,  $p <$   
265  $0.001$ ; Supplementary Table 3b). In GS,  $h^2_{\text{SNP}}$  was not significant for GHQ ( $h^2_{\text{SNP}} =$   
266  $0.071$ ,  $p = 0.165$ ;  $N = 4\,919$ ). However, in an ad hoc estimation from the baseline  
267 sample of 6 751 unrelated GS participants (details in Supplementary Table 3b) we  
268 detected a significant  $h^2_{\text{SNP}}$  for GHQ ( $h^2_{\text{SNP}} = 0.135$ ;  $p < 5.15 \times 10^{-3}$ ), suggesting that the  
269 power to estimate  $h^2_{\text{SNP}}$  in GS may be limited by sample size. Estimates were not  
270 significant for neither TSLE ( $h^2_{\text{SNP}} = 0.061$ ,  $p = 0.189$ ; Supplementary Table 3b) nor ISLE  
271 ( $h^2_{\text{SNP}} = 0.000$ ,  $p = 0.5$ ), but  $h^2_{\text{SNP}}$  was significant for DSLE ( $h^2_{\text{SNP}} = 0.131$ ,  $p = 0.029$ ),  
272 supporting a potential genetic mediation and gene-environment correlation.

273 **GWAS of depressive symptoms.** No genome-wide significant SNPs were detected by  
274 GWAS in either cohort. Top findings ( $p < 1 \times 10^{-5}$ ) are summarized in Supplementary  
275 Table 4. Manhattan and QQ plots are shown in Supplementary Figures 1-4. There was  
276 no evidence of genomic inflation (all  $\lambda_{1000} < 1.01$ ).

277 **Post-GWAS analyses.** Gene-based test identified six genes associated with PHQ using  
278 UKB-GWAS statistics at genome-wide significance (Bonferroni-corrected  $p = 2.77 \times 10^{-6}$ ;  
279  $DCC$ ,  $p = 7.53 \times 10^{-8}$ ;  $ACSS3$ ,  $p = 6.51 \times 10^{-7}$ ;  $DRD2$ ,  $p = 6.55 \times 10^{-7}$ ;  $STAG1$ ,  $p = 1.63 \times 10^{-6}$ ;  
280  $FOXP2$ ,  $p = 2.09 \times 10^{-6}$ ;  $KYNU$ ,  $p = 2.24 \times 10^{-6}$ ; Supplementary Figure 8). Prioritized genes  
281 based on position, eQTL and chromatin interaction mapping are detailed in  
282 Supplementary Table 5. No genes were detected in GS-GWAS gene-based test  
283 (Supplementary Figures 9). No tissue enrichment was detected from GWAS in either  
284 cohort. Significant gene-sets and GWAS catalog associations for UKB-GWAS are  
285 reported in Supplementary Table 6. These included the *biological process*: positive  
286 regulation of long term synaptic potentiation, and *GWAS catalog associations*: brain  
287 structure, schizophrenia, response to amphetamines, age-related cataracts (age at  
288 onset), fibrinogen, acne (severe), fibrinogen levels, and educational attainment; all  
289 adjusted- $p < 0.01$ . There was no significant gene-set enrichment from GS-GWAS.

290 **GWEIS of depressive symptoms.** Manhattan and QQ plots are shown in  
291 Supplementary Figures 1-4. There was no evidence of GWEIS inflation for either UKB  
292 or GS (all  $\lambda_{1000} < 1.01$ ). No genome-wide significant GWEIS associations were detected  
293 for SLE in UKB. GS-GWEIS using TSLE identified a significant GxE effect ( $p < 2.97 \times 10^{-8}$ )  
294 at an intragenic SNP on chromosome 11 (rs12789145,  $p = 4.95 \times 10^{-9}$ ,  $\beta = 0.06$ , closest  
295 gene: *PIWIL4*; Supplementary Figure 5), and using DSLE at an intronic SNP in *ZCCHC2*  
296 on chromosome 18 (rs17070072,  $p = 1.46 \times 10^{-8}$ ,  $\beta = -0.08$ ; Supplementary Figure 6). In  
297 their corresponding joint effect tests both rs12789145 ( $p = 2.77 \times 10^{-8}$ ) and rs17070072  
298 ( $p = 1.96 \times 10^{-8}$ ) were significant. GWEIS for joint effect using DSLE identified two  
299 further significant SNPs in on chromosome 9 (rs12000047,  $p = 2.00 \times 10^{-8}$ ,  $\beta = -0.23$ ;  
300 rs12005200,  $p = 2.09 \times 10^{-8}$ ,  $\beta = -0.23$ , LD  $r^2 > 0.8$ , closest gene: *CYLC2*; Supplementary

301 Figure 7). None of these associations replicated in UKB ( $p > 0.05$ ), although the effect  
302 direction was consistent between cohorts for the SNP close to *PIWL1* and SNPs at  
303 *CYLC2*. No SNP achieved genome-wide significant association in GS-GWEIS using ISLE  
304 as exposure. Top GWEIS results ( $p < 1 \times 10^{-5}$ ) are summarized in Supplementary Tables  
305 7-10.

306 **Post-GWEIS analyses: gene-based tests.** All results are shown in Supplementary  
307 Figures 10-17. Two genes were associated with PHQ using the joint effect from UKB-  
308 GWEIS (*ACSS3*  $p = 1.61 \times 10^{-6}$ ; *PHF2*,  $p = 2.28 \times 10^{-6}$ ; Supplementary Figure 11). *ACSS3*  
309 was previously identified using the additive main effects, whereas *PHF2* was only  
310 significantly associated using the joint effects. Gene-based tests identified *MTNR1B* as  
311 significantly associated with GHQ on GS-GWEIS using DSLE in both GxE ( $p = 1.53 \times 10^{-6}$ )  
312 and joint effects ( $p = 2.38 \times 10^{-6}$ ; Supplementary Figures 14-15).

313 **Post-GWEIS analyses: tissue enrichment.** We prioritized genes based on position,  
314 eQTL and chromatin interaction mapping in brain tissues and regions. In UKB,  
315 prioritized genes with GxE effect were enriched for up-regulated differentially  
316 expressed genes from adrenal gland (adjusted- $p = 3.58 \times 10^{-2}$ ). Using joint effects,  
317 prioritized genes were enriched on up-regulated differentially expressed genes from  
318 artery tibial (adjusted- $p = 4.34 \times 10^{-2}$ ). In GS, prioritized genes were enriched: in up-  
319 regulated differentially expressed genes from artery coronary (adjusted- $p = 4.55 \times 10^{-2}$ )  
320 using GxE effects with DSLE; in down-regulated differentially expressed genes from  
321 artery aorta tissue (adjusted- $p = 4.71 \times 10^{-2}$ ) using GxE effects with ISLE; in up-  
322 regulated differentially expressed genes from artery coronary (adjusted- $p = 5.97 \times 10^{-3}$ ,  
323 adjusted- $p = 9.57 \times 10^{-3}$ ) and artery tibial (adjusted- $p = 1.05 \times 10^{-2}$ , adjusted- $p = 1.55 \times 10^{-2}$ )  
324 tissues using joint effects with both TSLE and DSLE; and in down-regulated

325 differentially expressed genes from lung tissue (adjusted- $p = 3.98 \times 10^{-2}$ ) and in up- and  
326 down-regulated differentially expressed genes from the spleen (adjusted- $p = 4.71 \times 10^{-2}$ )  
327 using joint effects with ISLE. There was no enrichment using GxE effect with TSLE.

328 **Post-GWEIS analyses: gene-sets enrichment.** Significant gene-sets and GWAS catalog  
329 hits from GWEIS are detailed in Supplementary Tables 11-14, including for UKB  
330 *Biocarta*: GPCR pathway; *Reactome*: opioid signalling, neurotransmitter receptor  
331 binding and downstream transmission in the postsynaptic cell, transmission across  
332 chemical synapses, gastrin CREB signalling pathway via PKC and MAPK; *GWAS*  
333 *catalog*: post bronchodilator FEV1/FVC ratio, migraine and body mass index. In GS,  
334 enrichment was seen using TSLE and DLSE for *GWAS catalog*: age-related macular  
335 degeneration, myopia, urate levels and Heschl's gyrus morphology; and using ISLE for  
336 *biological process*: regulation of transporter activity. All adjusted- $p < 0.01$ .

337 **Cross-cohort prediction.** In GS, PRS<sub>D</sub> weighted by UKB-GWAS of PHQ significantly  
338 explained 0.56% of GHQ variance (*Empirical-p*  $< 1.10^{-4}$ ), similar to PRS<sub>MDD</sub> weighted by  
339 PGC MDD-GWAS ( $R^2 = 0.78\%$ , *Empirical-p*  $< 1.10^{-4}$ ). PRS<sub>GxE</sub> weighted by UKB-GWEIS  
340 GxE effects explained 0.15% of GHQ variance (*Empirical-p* = 0.03, Supplementary  
341 Table 15). PRS<sub>GxE</sub> fitted jointly with PRS<sub>MDD</sub> significantly improved prediction of GHQ  
342 ( $R^2 = 0.93\%$ , model  $p = 6.12 \times 10^{-11}$ ; predictive improvement of 19%, *LRT-p* =  $5.91 \times 10^{-3}$ )  
343 compared to PRS<sub>MDD</sub> alone. Similar to PRS<sub>GxE</sub> with PRS<sub>D</sub> ( $R^2 = 0.69\%$ , model  $p =$   
344  $2.72 \times 10^{-8}$ ; predictive improvement of 23%, *LRT-p* = 0.01). PRS<sub>Joint</sub> weighted by UKB-  
345 GWEIS also predicted GHQ ( $R^2 = 0.58\%$ , *Empirical-p*  $< 1.10^{-4}$ ), although the variance  
346 explained was significantly reduced compared to the model fitting PRS<sub>GxE</sub> and PRS<sub>D</sub>  
347 together (*LRT-p* =  $4.69 \times 10^{-7}$ ), suggesting that additive and GxE effects should be  
348 modelled independently for polygenic approaches (Figure 2a).

349 In UKB (Figure 2b), both PRS<sub>D</sub> weighted by GS-GWAS of GHQ and PRS<sub>MDD</sub> significantly  
350 explained 0.04% and 0.45% of PHQ variance, respectively (both *Empirical-p* < 1.10<sup>-4</sup>;  
351 Supplementary Table 15). PRS<sub>GxE</sub> derived from GS-GWEIS GxE effect did not  
352 significantly predict PHQ (TSLE-PRS<sub>GxE</sub> *Empirical-p* = 0.382; DSLE-PRS<sub>GxE</sub> *Empirical-p*  
353 = 0.642; ISLE-PRS<sub>GxE</sub> *Empirical-p* = 0.748). Predictive improvements by PRS<sub>GxE</sub> effect  
354 fitted jointly with PRS<sub>MDD</sub> or PRS<sub>D</sub> were not significant (all *LRT-p* > 0.08). PRS<sub>Joint</sub>  
355 significantly predicted PHQ (TSLE-PRS<sub>Joint</sub>: R<sup>2</sup> = 0.032%, *Empirical-p* < 1.10<sup>-4</sup>; DSLE-  
356 PRS<sub>Joint</sub>: R<sup>2</sup> = 0.012%, *Empirical-p* = 4.3x10<sup>-3</sup>; ISLE-PRS<sub>Joint</sub>: R<sup>2</sup> = 0.032%, *Empirical-p* <  
357 1.10<sup>-4</sup>), although the variances explained were significantly reduced compared to the  
358 models fitting PRS<sub>GxE</sub> and PRS<sub>D</sub> together (all *LRT-p* < 1.48x10<sup>-3</sup>).

359 **Prediction of stress-related traits.** Prediction of stress-related traits in independent  
360 samples using PRS<sub>D</sub>, PRS<sub>GxE</sub> and PRS<sub>Joint</sub> are summarized in Figure 3a and  
361 Supplementary Table 16. Significant trait prediction after FDR adjustment (*Empirical-*  
362 *p* < 6.16x10<sup>-3</sup>, FDR-adjusted *Empirical-p* < 0.05) using both UKB and GS PRS<sub>D</sub> was seen  
363 for: depression status, neuroticism and schizotypal personality. PRS<sub>GxE</sub> weighted by  
364 GS-GWEIS GxE effect using ISLE significantly predicted depression status mapping by  
365 proxy (*Empirical-p* = 7.00x10<sup>-4</sup>, FDR-adjusted *Empirical-p* = 9.54x10<sup>-3</sup>).

366 Nominally significant predictive improvements (*LRT-p* < 0.05) of fitting PRS<sub>GxE</sub> over the  
367 PRS<sub>D</sub> effect alone using summary statistics generated from both UKB and GS were  
368 detected for schizotypal personality, heart diseases and COPD by proxy (Figure 3b).  
369 PRS<sub>GxE</sub> weighted by GS-GWEIS GxE effect using ISLE significantly improved prediction  
370 over PRS<sub>D</sub> effect alone of depression status mapping by proxy after FDR adjustment  
371 (*LRT-p* = 1.96x10<sup>-4</sup>, FDR-adjusted *LRT-p* = 2.35x10<sup>-2</sup>).

372



## 373 DISCUSSION

374 This study performs GWAS and incorporates data on recent adult stressful life events  
375 (SLE) into GWEIS of depressive symptoms, identifies new loci and candidate genes for  
376 the modulation of genetic response to SLE; and provides insights to help disentangle  
377 the underlying aetiological mechanisms increasing genetic liability through SLE to  
378 both depressive symptoms and stress-related traits.

379 SNP-heritability of depressive symptoms ( $h^2_{\text{SNP}} = 9\text{-}13\%$ ), were slightly higher than  
380 estimates from African American populations<sup>34</sup>, and over a third larger than estimates  
381 in MDD from European samples<sup>79</sup>.  $h^2_{\text{SNP}}$  for PHQ in UKB (9.0%) remained significant  
382 after adjusting for SLE (7.9%). Thus, although some genetic contributions may be  
383 partially shared between depressive symptoms and reporting of SLE, there is still a  
384 relatively large genetic contribution unique to depressive symptoms. Significant  $h^2_{\text{SNP}}$   
385 of DSLE in GS (13%) and TSLE<sub>UKB</sub> in UKB (4%), which is mainly composed of dependent  
386 SLE items, were detected similar to previous studies (8% and 29%)<sup>34,43</sup>. Conversely,  
387 there was no evidence for heritability of independent SLE. A significant bivariate  
388 genetic correlation between depressive symptoms and SLE ( $r_G = 0.72$ ) was detected  
389 in UKB after adjusting for covariates, suggesting that there are shared common  
390 variants underlying self-reported depressive symptoms and SLE. This bivariate genetic  
391 correlation was smaller than that estimated from African American populations ( $r_G =$   
392  $0.97$ ;  $p = 0.04$ ;  $N = 7\ 179$ )<sup>34</sup>. Genetic correlations between SLE measures and GHQ  
393 were not significant in GS ( $N = 4\ 919$ ;  $r_G = 1$ ; all  $p > 0.056$ ), perhaps due to a lack of  
394 power in this smaller sample.

395 Post-GWAS gene-based tests detected six genes significantly associated with PHQ  
396 (*DCC*, *ACSS3*, *DRD2*, *STAG1*, *FOXP2* and *KYNU*). Previous studies have implicated these

397 genes in liability to depression (see Supplementary Table 17), and three of them are  
398 genome-wide significant in gene-based tests from the latest meta-analysis of major  
399 depression that includes UKB (*DCC*,  $p = 2.57 \times 10^{-14}$ ; *DRD2*,  $p = 5.35 \times 10^{-14}$ ; and *KYNU*,  $p =$   
400  $2.38 \times 10^{-6}$ ;  $N = 807\,553$ )<sup>80</sup>. This supports the implementation of quantitative measures  
401 such as PHQ to detect genes underlying lifetime depression status<sup>81</sup>. For example,  
402 significant gene ontology analysis of the UKB-GWAS identified enrichment for positive  
403 regulation of long-term synaptic potentiation, and for previous GWAS findings of  
404 brain structure<sup>82</sup>, schizophrenia<sup>83</sup> and response to amphetamines<sup>84</sup>.

405 The key element of this study was to conduct GWEIS of depressive symptoms and  
406 recent SLE. We identified two loci with significant GxE effect in GS. However, none of  
407 these associations replicated in UKB ( $p > 0.05$ ). The strongest association was using  
408 TSLE at 53kb down-stream of *PIWIL4* (rs12789145). *PIWIL4* is brain-expressed and  
409 involved in chromatin-modification<sup>85</sup>, suggesting it may moderate the effects of stress  
410 on depression. It encodes HIWI2, a protein thought to regulate OTX2, which is critical  
411 for the development of forebrain and for coordinating critical periods of plasticity  
412 disrupting the integration of cortical circuits<sup>86,87</sup>. Indeed, an intronic SNP in *PIWIL4*  
413 was identified as the strongest GxE signal in ADHD using mother's warmth as  
414 environmental exposure<sup>88</sup>. The other significant GxE identified in our study was in  
415 *ZCCHC2* using DSLE. This zinc finger protein is expressed in blood CD4+ T-cells and is  
416 down regulated in individuals with MDD<sup>89</sup> and in those resistant to treatment with  
417 citalopram<sup>90</sup>. No GxE effect was seen using ISLE as exposure.

418 No significant locus or gene with GxE effect was detected in UKB-GWEIS.  
419 Nevertheless, joint effects (combined additive main and GxE genetic effects)  
420 identified two genes significantly associated with PHQ (*ACSS3* and *PHF2*; see

421 Supplementary Table 17). *PHF2* was recently detected as genome-wide significant at  
422 the latest meta-analysis of depression<sup>80</sup>. Notably, *PHF2* paralogs have already been  
423 link with MDD through stress-response in three other studies<sup>91-93</sup>. Joint effects in GS  
424 also detected an additional significant association upstream *CYLC2*, a gene nominally  
425 associated ( $p < 1 \times 10^{-5}$ ) with obsessive-compulsive disorder and Tourette's  
426 Syndrome<sup>94</sup>. Gene-based test from GS-GWEIS identified a significant association with  
427 *MTNR1B*, a melatonin receptor gene, using DSLE (both GxE and joint effect;  
428 Supplementary Table 17). Prioritized genes using GxE effects were enriched in  
429 differentially expressed genes from several tissues including the adrenal gland, which  
430 releases cortisol into the blood-stream in response to stress, thus playing a key role in  
431 the stress-response system, reinforcing a potential role of GxE in stress-related  
432 conditions.

433 The different instruments and sample sizes available make it hard to compare results  
434 between cohorts. Whereas GS contains deeper phenotyping measurements of stress  
435 and depressive symptoms than UKB, the sample size is much smaller, which may be  
436 reflected in the statistical power required to detect reliable GxE effects. Furthermore,  
437 the presence and size of GxE are dependent on their parameterization (i.e. the  
438 measurement, scale and distribution of the instruments used to test such  
439 interaction)<sup>95</sup>. Thus, GxE may be incomparable across GWEIS due to differences in  
440 both phenotype assessment and stressors tested. Although our results suggest that  
441 both depressive symptom measures are correlated with lifetime depression status,  
442 different influences on depressive symptoms from the SLE covered across studies  
443 may contribute to lack of stronger replication. Instruments in GS cover a wider range  
444 of SLE and are more likely to capture changes in depressive symptoms as

445 consequence of their short-term effects. Conversely, UKB could capture more marked  
446 long-term effects, as SLE were captured over 2 years compared to 6 months in GS.  
447 New mental health questionnaires covering a wide range of psychiatric symptoms  
448 and SLE in the last release of UKB data provides the opportunity to create more  
449 similar measures to GS in the near future. Further replication in independent studies  
450 with equivalent instruments is required to validate our GWEIS findings. Despite these  
451 limitations and a lack of overlap in the individual genes prioritised from the two  
452 GWEIS, replication was seen in the predictive improvement of using  $PRS_{GxE}$  derived  
453 from the GWEIS GxE effects to predict stress-related phenotypes.  
454 The third aim of this study was to test whether GxE effect could improve predictive  
455 genetic models, and thus help to explain deviation from additive models and missing  
456 heritability of MDD<sup>96</sup>. Multiple regression models suggested that inclusion of  $PRS_{GxE}$   
457 weighted by GxE effects could improve prediction of an individual's depressive  
458 symptoms over use of  $PRS_{MDD}$  or  $PRS_D$  weighted by additive effects alone. In GS, we  
459 detected a predictive gain of 19% over  $PRS_{MDD}$  weighted by PGC MDD-GWAS, and a  
460 gain of 23% over  $PRS_D$  weighted by UKB-GWAS (Figure 2a). However, these findings  
461 did not surpass stringent Bonferroni-correction and could not be validated in UKB.  
462 This may reflect in the poor predictive power of the PRS generated from the much  
463 smaller GS discovery sample. The results show a noticeably reduced prediction using  
464  $PRS_{Joint}$  weighted by joint effects, which suggests that the genetic architecture of  
465 stress-response is at least partially independent and differs from genetic additive  
466 main effects. Therefore, our results from multiple regression models suggest that for  
467 polygenic approaches main and GxE effects should be modelled independently.  
468 SLE effects are not limited to mental illness<sup>46</sup>.

469 Our final aim was to investigate shared aetiology between GxE for depressive  
470 symptoms and stress-related traits. Despite the differences between the respondents  
471 and non-respondents (Table 1 legend), a significant improvement was seen predicting  
472 depressive status mapping by proxy cases using GxE effect from GS-GWEIS with  
473 independent SLE (*FDR-adjusted LRT-p* = 0.013), but not with dependent SLE. GxE  
474 effects using statistics generated from both discovery samples, despite the  
475 differences in measures, nominally improved the phenotypic prediction of schizotypal  
476 personality, heart disease and the proxy of COPD (*LRT-p* < 0.05). Other studies have  
477 found evidence supporting a link between stress and depression in these phenotypes  
478 that support our results (see Supplementary Material for extended review) and  
479 suggest, for instance, potential pleiotropy between schizotypal personality and stress-  
480 response. Our findings point to a potential genetic component underlying a stress-  
481 response-depression-comorbidities link due, at least in part, to shared stress-  
482 response mechanisms. A relationship between SLE, depression and coping strategies  
483 such as smoking suggests that perhaps, genetic stress-response may modulate  
484 adaptive behaviours such as smoking, fatty diet intake, alcohol consumption and  
485 substance abuse. This is discussed further in the Supplementary Material.

486 In this study, evidence for SNPs with significant GxE effects came primarily from the  
487 analyses of dependent SLE and not from independent SLE. This supports a genetic  
488 effect on probability of exposure to, or reporting of SLE, endorsing a gene-  
489 environment correlation. Chronic stress may influence cognition, decision-making  
490 and behaviour eventually leading to higher risk-taking<sup>97</sup>. These conditions may also  
491 increase sensitivity to stress amongst vulnerable individuals, including those with  
492 depression, who also have a higher propensity to report SLE, particularly dependent

493 SLE<sup>39</sup>. A potential reporting bias in dependent SLE may be mediated as well by  
494 heritable behavioural, anxiety or psychological traits such as risk-taking<sup>43,98</sup>.  
495 Furthermore, individuals vulnerable to MDD may expose themselves into  
496 environments of higher risk and stress<sup>14</sup>. This complex interplay, reflected in the form  
497 of a gene-environment correlation effect, would hinder the interpretation of GxE  
498 effects from GWEIS as pure interactions. A mediation of associations between SLE  
499 and depressive symptoms through genetically driven sensitivity to stress, personality  
500 or behavioural traits would support the possibility of subtle genotype-by-genotype  
501 (GxG) interactions, or genotype-by-genotype-by-environment (GxGxE) interactions  
502 contributing to depression<sup>99,100</sup>. In contrast, PRS prediction of the stress-related traits:  
503 schizotypal personality, heart disease and COPD, was primarily from derived weights  
504 using independent SLE, suggesting that a common set of variants moderate the  
505 effects of SLE across stress-related traits and that larger sample sizes will be required  
506 to detect the individual SNPs contributing to this. Thus, our finding supports the  
507 inclusion of environmental information into GWAS to enhance the detection of  
508 relevant genes. Results of studying dependent and independent SLE support a  
509 contribution of genetically mediated exposure to and/or reporting of SLE, perhaps  
510 through sensitivity to stress as mediator.

511 This study emphasises the relevance of GxE in depression and human health in  
512 general and provides the basis for future lines of research.

513

514 **ACKNOWLEDGMENTS**

515 See Supplementary Material: acknowledgments.

516

517 **FINANCIAL DISCLOSURE**

518 The authors declare no conflict of interest.

519

520 Supplementary Material is available at Translational Psychiatry's website.

521

## 522 REFERENCES

- 523 1. Plomin, R., Owen, M. & McGuffin, P. The genetic basis of complex human  
524 behaviors. *Science* **264**, 1733-1739 (1994).
- 525 2. Kendler, K.S. & Eaves, L.J. Models for the joint effect of genotype and  
526 environment on liability to psychiatric illness. *Am J Psychiatry* **143**, 279-89  
527 (1986).
- 528 3. Kendler, K.S. & Baker, J.H. Genetic influences on measures of the  
529 environment: a systematic review. *Psychol Med* **37**, 615-26 (2007).
- 530 4. Colodro-Conde, L. *et al.* A direct test of the diathesis-stress model for  
531 depression. *Mol Psychiatry* (2017).
- 532 5. Luciano, M. *et al.* Shared genetic aetiology between cognitive ability and  
533 cardiovascular disease risk factors: Generation Scotland's Scottish family  
534 health study. *Intelligence* **38**, 304-313 (2010).
- 535 6. Kessler, R.C. & Bromet, E.J. The epidemiology of depression across  
536 cultures. *Annu Rev Public Health* **34**, 119-38 (2013).
- 537 7. Sullivan, P.F., Neale, M.C. & Kendler, K.S. Genetic epidemiology of major  
538 depression: review and meta-analysis. *Am J Psychiatry* **157**, 1552-62  
539 (2000).
- 540 8. Hammen, C. Stress and depression. *Annu Rev Clin Psychol* **1**, 293-319  
541 (2005).
- 542 9. Kessler, R.C. The effects of stressful life events on depression. *Annu Rev*  
543 *Psychol* **48**, 191-214 (1997).
- 544 10. Kendler, K.S., Karkowski, L.M. & Prescott, C.A. Causal relationship between  
545 stressful life events and the onset of major depression. *Am J Psychiatry*  
546 **156**, 837-41 (1999).
- 547 11. Stroud, C.B., Davila, J. & Moyer, A. The relationship between stress and  
548 depression in first onsets versus recurrences: a meta-analytic review. *J*  
549 *Abnorm Psychol* **117**, 206-13 (2008).
- 550 12. Kendler, K.S., Karkowski, L.M. & Prescott, C.A. Stressful life events and  
551 major depression: risk period, long-term contextual threat, and diagnostic  
552 specificity. *J Nerv Ment Dis* **186**, 661-9 (1998).
- 553 13. Silberg, J., Rutter, M., Neale, M. & Eaves, L. Genetic moderation of  
554 environmental risk for depression and anxiety in adolescent girls. *Br J*  
555 *Psychiatry* **179**, 116-21 (2001).
- 556 14. Kendler, K.S. *et al.* Stressful life events, genetic liability, and onset of an  
557 episode of major depression in women. *Am J Psychiatry* **152**, 833-42  
558 (1995).
- 559 15. Arnau-Soler, A., Adams, M., Hayward, C. & Thomson, P. Genome-wide  
560 interaction study of a proxy for stress-sensitivity and its prediction of  
561 major depressive disorder. *bioRxiv* (2018).
- 562 16. Arnau-Soler, A. *et al.* A validation of the diathesis-stress model for  
563 depression in Generation Scotland. *bioRxiv* (2018).
- 564 17. Garantziotis, S. & Schwartz, D.A. Ecogenomics of respiratory diseases of  
565 public health significance. *Annu Rev Public Health* **31**, 37-51 1 p following  
566 51 (2010).
- 567 18. Aschard, H. *et al.* Evidence for large-scale gene-by-smoking interaction  
568 effects on pulmonary function. *Int J Epidemiol* **46**, 894-904 (2017).



- 569 19. Molfino, N.A. & Coyle, A.J. Gene-environment interactions in chronic  
570 obstructive pulmonary disease. *Int J Chron Obstruct Pulmon Dis* **3**, 491-7  
571 (2008).
- 572 20. Polonikov, A.V., Ivanov, V.P. & Solodilova, M.A. Genetic variation of genes  
573 for xenobiotic-metabolizing enzymes and risk of bronchial asthma: the  
574 importance of gene-gene and gene-environment interactions for disease  
575 susceptibility. *J Hum Genet* **54**, 440-9 (2009).
- 576 21. Haiman, C.A. *et al.* Ethnic and racial differences in the smoking-related risk  
577 of lung cancer. *N Engl J Med* **354**, 333-42 (2006).
- 578 22. Han, J., Hankinson, S.E., Colditz, G.A. & Hunter, D.J. Genetic variation in  
579 XRCC1, sun exposure, and risk of skin cancer. *Br J Cancer* **91**, 1604-9  
580 (2004).
- 581 23. Manning, A.K. *et al.* A genome-wide approach accounting for body mass  
582 index identifies genetic variants influencing fasting glycemic traits and  
583 insulin resistance. *Nat Genet* **44**, 659-69 (2012).
- 584 24. Wang, L., Murk, W. & DeWan, A.T. Genome-Wide Gene by Environment  
585 Interaction Analysis Identifies Common SNPs at 17q21.2 that Are  
586 Associated with Increased Body Mass Index Only among Asthmatics. *PLoS*  
587 *One* **10**, e0144114 (2015).
- 588 25. Siegert, S. *et al.* Genome-wide investigation of gene-environment  
589 interactions in colorectal cancer. *Hum Genet* **132**, 219-31 (2013).
- 590 26. Gong, J. *et al.* Genome-Wide Interaction Analyses between Genetic Variants  
591 and Alcohol Consumption and Smoking for Risk of Colorectal Cancer. *PLoS*  
592 *Genet* **12**, e1006296 (2016).
- 593 27. Polfus, L.M. *et al.* Genome-wide association study of gene by smoking  
594 interactions in coronary artery calcification. *PLoS One* **8**, e74642 (2013).
- 595 28. Duncan, L.E. & Keller, M.C. A critical review of the first 10 years of  
596 candidate gene-by-environment interaction research in psychiatry. *Am J*  
597 *Psychiatry* **168**, 1041-9 (2011).
- 598 29. Risch, N. *et al.* Interaction between the serotonin transporter gene (5-  
599 HTTLPR), stressful life events, and risk of depression: a meta-analysis.  
600 *JAMA* **301**, 2462-71 (2009).
- 601 30. Karg, K., Burmeister, M., Shedden, K. & Sen, S. The serotonin transporter  
602 promoter variant (5-HTTLPR), stress, and depression meta-analysis  
603 revisited: evidence of genetic moderation. *Arch Gen Psychiatry* **68**, 444-54  
604 (2011).
- 605 31. Bleys, D., Luyten, P., Soenens, B. & Claes, S. Gene-environment interactions  
606 between stress and 5-HTTLPR in depression: A meta-analytic update.  
607 *Journal of Affective Disorders* **226**, 339-345 (2018).
- 608 32. Peyrot, W.J. *et al.* Does Childhood Trauma Moderate Polygenic Risk for  
609 Depression? A Meta-analysis of 5765 Subjects From the Psychiatric  
610 Genomics Consortium. *Biol Psychiatry* (2017).
- 611 33. Kraft, P., Yen, Y.C., Stram, D.O., Morrison, J. & Gauderman, W.J. Exploiting  
612 gene-environment interaction to detect genetic associations. *Hum Hered*  
613 **63**, 111-9 (2007).
- 614 34. Dunn, E.C. *et al.* Genome-Wide Association Study (Gwas) and Genome-  
615 Wide by Environment Interaction Study (Gweis) of Depressive Symptoms  
616 in African American and Hispanic/Latina Women. *Depress Anxiety* **33**, 265-  
617 80 (2016).

- 618 35. Otowa, T. *et al.* The First Pilot Genome-Wide Gene-Environment Study of  
619 Depression in the Japanese Population. *PLoS One* **11**, e0160823 (2016).
- 620 36. Ikeda, M. *et al.* Genome-wide environment interaction between depressive  
621 state and stressful life events. *J Clin Psychiatry* **77**, e29-30 (2016).
- 622 37. Coleman, J.R.I., Eley, T.C. & Breen, G. Genome-wide gene-environment  
623 analyses of depression and reported lifetime traumatic experiences in UK  
624 Biobank. *bioRxiv* (2018).
- 625 38. Plomin, R., DeFries, J.C. & Loehlin, J.C. Genotype-environment interaction  
626 and correlation in the analysis of human behavior. *Psychol Bull* **84**, 309-22  
627 (1977).
- 628 39. Clarke, T. *et al.* Genetic and environmental determinants of stressful life  
629 events and their overlap with depression and neuroticism [version 1;  
630 referees: 3 approved with reservations]. *Wellcome Open Research* **3**(2018).
- 631 40. Brugha, T., Bebbington, P., Tennant, C. & Hurry, J. The List of Threatening  
632 Experiences: a subset of 12 life event categories with considerable long-  
633 term contextual threat. *Psychol Med* **15**, 189-94 (1985).
- 634 41. Kendler, K.S., Karkowski, L.M. & Prescott, C.A. The assessment of  
635 dependence in the study of stressful life events: validation using a twin  
636 design. *Psychol Med* **29**, 1455-60 (1999).
- 637 42. Plomin, R., Lichtenstein, P., Pedersen, N.L., McClearn, G.E. & Nesselroade,  
638 J.R. Genetic influence on life events during the last half of the life span.  
639 *Psychol Aging* **5**, 25-30 (1990).
- 640 43. Power, R.A. *et al.* Estimating the heritability of reporting stressful life  
641 events captured by common genetic variants. *Psychol Med* **43**, 1965-71  
642 (2013).
- 643 44. Bemmels, H.R., Burt, S.A., Legrand, L.N., Iacono, W.G. & McGue, M. The  
644 heritability of life events: an adolescent twin and adoption study. *Twin Res*  
645 *Hum Genet* **11**, 257-65 (2008).
- 646 45. Boardman, J.D., Alexander, K.B. & Stallings, M.C. Stressful life events and  
647 depression among adolescent twin pairs. *Biodemography Soc Biol* **57**, 53-  
648 66 (2011).
- 649 46. Salleh, M.R. Life event, stress and illness. *Malays J Med Sci* **15**, 9-18 (2008).
- 650 47. Thaipisuttikul, P., Ittasakul, P., Waleeprakhon, P., Wisajun, P. & Jullagate, S.  
651 Psychiatric comorbidities in patients with major depressive disorder.  
652 *Neuropsychiatr Dis Treat* **10**, 2097-103 (2014).
- 653 48. Moussavi, S. *et al.* Depression, chronic diseases, and decrements in health:  
654 results from the World Health Surveys. *Lancet* **370**, 851-8 (2007).
- 655 49. Topic, R. *et al.* Somatic comorbidity, metabolic syndrome, cardiovascular  
656 risk, and CRP in patients with recurrent depressive disorders. *Croat Med J*  
657 **54**, 453-9 (2013).
- 658 50. Lloyd, C.E., Roy, T., Nouwen, A. & Chauhan, A.M. Epidemiology of  
659 depression in diabetes: international and cross-cultural issues. *J Affect*  
660 *Disord* **142 Suppl**, S22-9 (2012).
- 661 51. Ohayon, M.M. & Schatzberg, A.F. Using chronic pain to predict depressive  
662 morbidity in the general population. *Arch Gen Psychiatry* **60**, 39-47 (2003).
- 663 52. Slavich, G.M. & Irwin, M.R. From stress to inflammation and major  
664 depressive disorder: a social signal transduction theory of depression.  
665 *Psychol Bull* **140**, 774-815 (2014).

- 666 53. Smith, B.H. *et al.* Cohort Profile: Generation Scotland: Scottish Family  
667 Health Study (GS:SFHS). The study, its participants and their potential for  
668 genetic research on health and illness. *Int J Epidemiol* **42**, 689-700 (2013).
- 669 54. Gunderson, K.L. Whole-Genome Genotyping on Bead Arrays. in *DNA*  
670 *Microarrays for Biomedical Research: Methods and Protocols* (ed. Dufva, M.)  
671 197-213 (Humana Press, Totowa, NJ, 2009).
- 672 55. Kerr, S.M. *et al.* Pedigree and genotyping quality analyses of over 10,000  
673 DNA samples from the Generation Scotland: Scottish Family Health Study.  
674 *BMC Med Genet* **14**, 38 (2013).
- 675 56. Nagy, R. *et al.* Exploration of haplotype research consortium imputation  
676 for genome-wide association studies in 20,032 Generation Scotland  
677 participants. *Genome Med* **9**, 23 (2017).
- 678 57. Navrady, L.B. *et al.* Cohort Profile: Stratifying Resilience and Depression  
679 Longitudinally (STRADL): a questionnaire follow-up of Generation  
680 Scotland: Scottish Family Health Study (GS:SFHS). *Int J Epidemiol* (2017).
- 681 58. Smith, B.H. *et al.* Generation Scotland: the Scottish Family Health Study; a  
682 new resource for researching genes and heritability. *BMC Med Genet* **7**, 74  
683 (2006).
- 684 59. Fernandez-Pujals, A.M. *et al.* Epidemiology and Heritability of Major  
685 Depressive Disorder, Stratified by Age of Onset, Sex, and Illness Course in  
686 Generation Scotland: Scottish Family Health Study (GS:SFHS). *PLoS One* **10**,  
687 e0142197 (2015).
- 688 60. Huang, J. *et al.* Improved imputation of low-frequency and rare variants  
689 using the UK10K haplotype reference panel. *Nat Commun* **6**, 8111 (2015).
- 690 61. Sudlow, C. *et al.* UK biobank: an open access resource for identifying the  
691 causes of a wide range of complex diseases of middle and old age. *PLoS*  
692 *Med* **12**, e1001779 (2015).
- 693 62. Biobank, U. UK Biobank: protocol for a large-scale prospective  
694 epidemiological resource. (2010).
- 695 63. Biobank, U. UK Biobank ethics and governance framework, version 3.0  
696 (2007).
- 697 64. Brugha, T.S. & Cragg, D. The List of Threatening Experiences: the reliability  
698 and validity of a brief life events questionnaire. *Acta Psychiatr Scand* **82**,  
699 77-81 (1990).
- 700 65. Motrico, E. *et al.* Psychometric properties of the List of Threatening  
701 Experiences--LTE and its association with psychosocial factors and mental  
702 disorders according to different scoring methods. *J Affect Disord* **150**, 931-  
703 40 (2013).
- 704 66. Goldberg, D.P. & Hillier, V.F. A scaled version of the General Health  
705 Questionnaire. *Psychol Med* **9**, 139-45 (1979).
- 706 67. Sterling, M. General Health Questionnaire - 28 (GHQ-28). *J Physiother* **57**,  
707 259 (2011).
- 708 68. Goldberg, D.P. *et al.* The validity of two versions of the GHQ in the WHO  
709 study of mental illness in general health care. *Psychol Med* **27**, 191-7  
710 (1997).
- 711 69. Wang, L. *et al.* [Value of patient health questionnaires (PHQ)-9 and PHQ-2  
712 for screening depression disorders in cardiovascular outpatients].  
713 *Zhonghua Xin Xue Guan Bing Za Zhi* **43**, 428-31 (2015).
- 714 70. Spitzer, R.L., Kroenke, K. & Williams, J.B. Validation and utility of a self-  
715 report version of PRIME-MD: the PHQ primary care study. Primary Care

- 716 Evaluation of Mental Disorders. Patient Health Questionnaire. *JAMA* **282**,  
717 1737-44 (1999).
- 718 71. Smith, D.J. *et al.* Prevalence and characteristics of probable major  
719 depression and bipolar disorder within UK biobank: cross-sectional study  
720 of 172,751 participants. *PLoS One* **8**, e75362 (2013).
- 721 72. Liu, J.Z., Erlich, Y. & Pickrell, J.K. Case-control association mapping by  
722 proxy using family history of disease. *Nat Genet* **49**, 325-331 (2017).
- 723 73. Yang, J., Lee, S.H., Goddard, M.E. & Visscher, P.M. GCTA: a tool for genome-  
724 wide complex trait analysis. *Am J Hum Genet* **88**, 76-82 (2011).
- 725 74. Purcell, S. *et al.* PLINK: a tool set for whole-genome association and  
726 population-based linkage analyses. *Am J Hum Genet* **81**, 559-75 (2007).
- 727 75. Almqvist, L.M. *et al.* Correcting systematic inflation in genetic association tests  
728 that consider interaction effects: application to a genome-wide association  
729 study of posttraumatic stress disorder. *JAMA Psychiatry* **71**, 1392-9 (2014).
- 730 76. Keller, M.C. Gene x environment interaction studies have not properly  
731 controlled for potential confounders: the problem and the (simple)  
732 solution. *Biol Psychiatry* **75**, 18-24 (2014).
- 733 77. Watanabe, K., Taskesen, E., van Bochoven, A. & Posthuma, D. FUMA:  
734 Functional mapping and annotation of genetic associations. *bioRxiv*  
735 (2017).
- 736 78. Euesden, J., Lewis, C.M. & O'Reilly, P.F. PRSice: Polygenic Risk Score  
737 software. *Bioinformatics* **31**, 1466-8 (2015).
- 738 79. Cross-Disorder Group of the Psychiatric Genomics, C. *et al.* Genetic  
739 relationship between five psychiatric disorders estimated from genome-  
740 wide SNPs. *Nat Genet* **45**, 984-94 (2013).
- 741 80. Howard, D.M. *et al.* Genome-wide meta-analysis of depression in 807,553  
742 individuals identifies 102 independent variants with replication in a  
743 further 1,507,153 individuals. *bioRxiv* (2018).
- 744 81. Altman, D.G. & Royston, P. The cost of dichotomising continuous variables.  
745 *BMJ* **332**, 1080 (2006).
- 746 82. Stein, J.L. *et al.* Voxelwise genome-wide association study (vGWAS).  
747 *Neuroimage* **53**, 1160-74 (2010).
- 748 83. Li, Z. *et al.* Genome-wide association analysis identifies 30 new  
749 susceptibility loci for schizophrenia. *Nat Genet* **49**, 1576-1583 (2017).
- 750 84. Hart, A.B. *et al.* Genome-wide association study of d-amphetamine  
751 response in healthy volunteers identifies putative associations, including  
752 cadherin 13 (CDH13). *PLoS One* **7**, e42646 (2012).
- 753 85. Sugimoto, K. *et al.* The induction of H3K9 methylation by PIWIL4 at the  
754 p16Ink4a locus. *Biochem Biophys Res Commun* **359**, 497-502 (2007).
- 755 86. Sivagurunathan, S., Arunachalam, J.P. & Chidambaram, S. PIWI-like protein,  
756 HIWI2 is aberrantly expressed in retinoblastoma cells and affects cell-  
757 cycle potentially through OTX2. *Cell Mol Biol Lett* **22**, 17 (2017).
- 758 87. Lee, H.H.C. *et al.* Genetic Otx2 mis-localization delays critical period  
759 plasticity across brain regions. *Mol Psychiatry* **22**, 680-688 (2017).
- 760 88. Sonuga-Barke, E.J. *et al.* Does parental expressed emotion moderate  
761 genetic effects in ADHD? An exploration using a genome wide association  
762 scan. *Am J Med Genet B Neuropsychiatr Genet* **147B**, 1359-68 (2008).
- 763 89. Belzeaux, R. *et al.* Responder and nonresponder patients exhibit different  
764 peripheral transcriptional signatures during major depressive episode.  
765 *Transl Psychiatry* **2**, e185 (2012).

- 766 90. Mamdani, F., Berlim, M.T., Beaulieu, M.M. & Turecki, G. Pharmacogenomic  
767 predictors of citalopram treatment outcome in major depressive disorder.  
768 *World J Biol Psychiatry* **15**, 135-44 (2014).
- 769 91. Wong, M.L. *et al.* The PHF21B gene is associated with major depression  
770 and modulates the stress response. *Mol Psychiatry* **22**, 1015-1025 (2017).
- 771 92. Walsh, R.M. *et al.* Phf8 loss confers resistance to depression-like and  
772 anxiety-like behaviors in mice. *Nat Commun* **8**, 15142 (2017).
- 773 93. Shi, G. *et al.* PHD finger protein 2 (PHF2) represses ribosomal RNA gene  
774 transcription by antagonizing PHF finger protein 8 (PHF8) and recruiting  
775 methyltransferase SUV39H1. *J Biol Chem* **289**, 29691-700 (2014).
- 776 94. Yu, D. *et al.* Cross-disorder genome-wide analyses suggest a complex  
777 genetic relationship between Tourette's syndrome and OCD. *Am J*  
778 *Psychiatry* **172**, 82-93 (2015).
- 779 95. Eaves, L.J., Last, K., Martin, N.G. & Jinks, J.L. A progressive approach to non-  
780 additivity and genotype-environmental covariance in the analysis of  
781 human differences. *British Journal of Mathematical and Statistical*  
782 *Psychology* **30**, 1-42 (1977).
- 783 96. Polderman, T.J. *et al.* Meta-analysis of the heritability of human traits  
784 based on fifty years of twin studies. *Nat Genet* **47**, 702-9 (2015).
- 785 97. Ceccato, S., Kudielka, B.M. & Schwieren, C. Increased Risk Taking in  
786 Relation to Chronic Stress in Adults. *Front Psychol* **6**, 2036 (2015).
- 787 98. Kandler, C., Bleidorn, W., Riemann, R., Angleitner, A. & Spinath, F.M. Life  
788 events as environmental States and genetic traits and the role of  
789 personality: a longitudinal twin study. *Behav Genet* **42**, 57-72 (2012).
- 790 99. Conway, C.C., Hammen, C., Brennan, P.A., Lind, P.A. & Najman, J.M.  
791 Interaction of chronic stress with serotonin transporter and catechol-O-  
792 methyltransferase polymorphisms in predicting youth depression. *Depress*  
793 *Anxiety* **27**, 737-45 (2010).
- 794 100. Cicchetti, D. & Rogosch, F.A. Genetic moderation of child maltreatment  
795 effects on depression and internalizing symptoms by serotonin  
796 transporter linked polymorphic region (5-HTTLPR), brain-derived  
797 neurotrophic factor (BDNF), norepinephrine transporter (NET), and  
798 corticotropin releasing hormone receptor 1 (CRHR1) genes in African  
799 American children. *Dev Psychopathol* **26**, 1219-39 (2014).

800

801

802 **FIGURE LEGENDS**

803

804 **Figure 1. Study flowchart.** Overview of analysis conducted on this study to achieve  
805 our aims: i) identify loci associated with depressive symptoms through genetic  
806 response to SLE; ii) test whether results of studying dependent and independent SLE  
807 support a contribution of genetically mediated exposure to stress; iii) assess whether  
808 GxE effects improve the proportion of phenotypic variance in depressive symptoms  
809 explained by genetic additive main effects alone and iv) test whether there is  
810 significant overlap in the genetic aetiology of the response to SLE and mental and  
811 physical stress-related phenotypes. Two core cohorts are used, Generation Scotland  
812 (GS) and UK Biobank (UKB). Summary statistics from Genome-Wide Association  
813 Studies (GWAS) and Genome-Wide by Environment Interaction Studies (GWEIS) are  
814 used to generate Polygenic Risk Scores (PRS). Summary statistics from Psychiatric  
815 Genetic Consortium (PGC) Major Depressive Disorder (MDD) GWAS are also used to  
816 generate PRS (PRS<sub>MDD</sub>). PRS weighted by: additive effects (PRS<sub>D</sub> and PRS<sub>MDD</sub>), GxE  
817 effects (PRS<sub>GxE</sub>) and joint effects (the combined additive and GxE effect; PRS<sub>Joint</sub>), are  
818 used for phenotypic prediction. TSLE stands for Total number of SLE reported. DSLE  
819 stands for SLE dependent on an individual's own behaviour. Conversely, ISLE stands for  
820 independent SLE. N stands for sample size. N<sub>noGS</sub> stands for sample size with GS  
821 individuals removed. N<sub>noUKB</sub> stands for sample size with UKB individuals removed.

822

823 **Figure 2. Prediction of depression scores by PRS<sub>GxE</sub>, PRS<sub>D</sub>, PRS<sub>MDD</sub> & PRS<sub>Joint</sub>.** Variance  
824 of depression score explained by PRS<sub>GxE</sub>, PRS<sub>D</sub>, PRS<sub>MDD</sub> and PRS<sub>Joint</sub> as single effect; and  
825 combining both PRS<sub>D</sub> and PRS<sub>MDD</sub> with PRS<sub>GxE</sub> in single models. Prediction was  
826 conducted using **2a)** Generation Scotland and **2b)** UK Biobank as target sample.  
827 PRS<sub>GxE</sub> were weighted by cross sample GWEIS using GxE effect. PRS<sub>D</sub> were weighted  
828 by cross sample GWAS of depressive symptoms effect. PRS<sub>MDD</sub> was weighted by PGC  
829 MDD-GWAS summary statistics. PRS<sub>Joint</sub> were weighted by cross sample GWEIS using  
830 joint effect. A nominally significant gain in variance explained of GHQ of about 23%  
831 was seen in Generation Scotland when PRS<sub>GxE</sub> was incorporated into a multiple  
832 regression model along with PRS<sub>D</sub>; and of about 19% when PRS<sub>GxE</sub> was incorporated  
833 into a multiple regression model along with PRS<sub>MDD</sub>. Such gain was not seen in UK  
834 Biobank, but it must be noted that both PRS<sub>D</sub> and PRS<sub>MDD</sub> also explains much less

835 variance of PHQ in UK Biobank than of GHQ in Generation Scotland. To note a  
836 noticeably reduction of variance explained by  $PRS_{\text{Joint}}$  compared to combined  
837 PRS/effects.

838

839 **Figure 3. a) PRS prediction in independent GS datasets.** Heatmap illustrating PRS  
840 prediction of a wide range of traits from GS listed in the x-axis (Table 1). (R) refers to  
841 traits using mapping by proxy approach (i.e. where first-degree relatives of individuals  
842 with the disease are considered proxy cases and included into the group of cases). Y-  
843 axis shows the discovery sample and the effect used to weight PRS. Numbers in cells  
844 indicate the % of variance explained, also represented by colour scale. Significance is  
845 represented by “\*” according to the following significance codes:  $p$ -values \*\*\*\* <  
846  $1 \times 10^{-4}$  < \*\*\* < 0.001 < \*\* < 0.01 \* < 0.05; in grey *Empirical-p-values* after permutation  
847 (10 000 times) and in yellow *FDR-adjusted Empirical-p-values*. **b) Predictive**  
848 **improvement by GxE effect in independent GS datasets.** Heatmap illustrating the  
849 predictive improvement as a result of incorporating  $PRS_{\text{GxE}}$  into a multiple model  
850 along with  $PRS_{\text{D}}$  and covariates (full model), over a model fitting  $PRS_{\text{D}}$  alone with  
851 covariates (null model); predicting a wide range of traits from GS listed in the x-axis  
852 (Table 1). Covariates: age, sex and 20 PCs. (R) refers to traits using mapping by proxy  
853 approach (i.e. where first-degree relatives of individuals with the disease are consider  
854 proxy cases and included into the group of cases).  $PRS_{\text{GxE}}$  are weighted by GWES  
855 using GxE effects.  $PRS_{\text{D}}$  were weighted by the GWAS of depressive symptoms additive  
856 main effects. The Y-axis shows the discovery sample used to weight PRS. Numbers in  
857 cells indicate the % of variance explained by the  $PRS_{\text{GxE}}$ , also represented by colour  
858 scale. Notice that those correspond to the  $PRS_{\text{GxE}}$  predictions in Figure 2 when  $PRS_{\text{GxE}}$   
859 are weighted by GxE effects. Significance was tested by Likelihood ratio tests (LRT):  
860 full model including  $PRS_{\text{D}}$  +  $PRS_{\text{GxE}}$  vs. null model with  $PRS_{\text{D}}$  alone (covariates  
861 adjusted). Significance is represented by “\*” according to the following significance  
862 codes:  $p$ -values \*\*\* < 0.001 < \*\* < 0.01 \* < 0.05; in grey *LRT-p-values* and in yellow  
863 *FDR-adjusted LRT-p-values*.

**Table 1. GS samples with stress-related phenotypes.**

| <b>Trait</b>                              | <b>N</b> | <b>Males/Females</b> | <b>N SNPs</b> | <b>N Cases</b> | <b>N Controls</b> |
|-------------------------------------------|----------|----------------------|---------------|----------------|-------------------|
| Alzheimer (R)                             | 3377     | 1475/1903            | 560622        | <b>655</b>     | <b>2722</b>       |
| Asthma                                    | 3390     | 1500/1890            | 560569        | <b>555</b>     | <b>2835</b>       |
| Asthma (R)                                | 3375     | 1470/1905            | 560432        | <b>910</b>     | <b>2465</b>       |
| Bowel cancer (R)                          | 3386     | 1495/1891            | 560630        | <b>672</b>     | <b>2714</b>       |
| Breast cancer                             | 3388     | 1486/1902            | 560611        | <b>83</b>      | <b>3305</b>       |
| Breast cancer (R)                         | 3386     | 1482/1904            | 560579        | <b>564</b>     | <b>2822</b>       |
| Chronic obstructive pulmonary disease     | 3387     | 1496/1891            | 560591        | <b>73</b>      | <b>3314</b>       |
| Chronic obstructive pulmonary disease (R) | 3387     | 1474/1913            | 560620        | <b>553</b>     | <b>2834</b>       |
| Depression                                | 3385     | 1495/1890            | 560584        | <b>483</b>     | <b>2902</b>       |
| Depression (R)                            | 3382     | 1506/1876            | 560514        | <b>731</b>     | <b>2651</b>       |
| Diabetes                                  | 3388     | 1497/1891            | 560469        | <b>185</b>     | <b>3203</b>       |
| Diabetes (R)                              | 3389     | 1481/1908            | 560584        | <b>1144</b>    | <b>2245</b>       |
| Heart disease                             | 3392     | 1504/1888            | 560526        | <b>212</b>     | <b>3180</b>       |
| Heart disease (R)                         | 3377     | 1483/1894            | 560479        | <b>2254</b>    | <b>1123</b>       |
| High blood pressure                       | 3402     | 1501/1901            | 560508        | <b>729</b>     | <b>2673</b>       |
| High blood pressure (R)                   | 3372     | 1464/1908            | 560569        | <b>1901</b>    | <b>1471</b>       |
| Hip fracture (R)                          | 3388     | 1489/1899            | 560572        | <b>421</b>     | <b>2967</b>       |
| Lung cancer (R)                           | 3379     | 1492/1887            | 560600        | <b>798</b>     | <b>2581</b>       |
| Osteoarthritis                            | 3395     | 1486/1909            | 560640        | <b>411</b>     | 2984              |
| Osteoarthritis (R)                        | 3383     | 1466/1917            | 560516        | <b>961</b>     | <b>2422</b>       |
| Parkinson (R)                             | 3388     | 1488/1900            | 560590        | <b>236</b>     | <b>3152</b>       |
| Prostate cancer (R)                       | 3381     | 1495/1886            | 560570        | <b>329</b>     | <b>3052</b>       |
| Rheumatoid arthritis                      | 3387     | 1490/1897            | 560618        | <b>93</b>      | <b>3294</b>       |
| Rheumatoid arthritis (R)                  | 3380     | 1487/1893            | 560543        | <b>765</b>     | <b>2615</b>       |
| Stroke                                    | 3387     | 1492/1895            | 560613        | <b>81</b>      | <b>3306</b>       |
| Stroke (R)                                | 3385     | 1463/1922            | 560478        | <b>1506</b>    | <b>1879</b>       |
| Neuroticism*                              | 3421     | 1521/1900            | 560484        | -              | -                 |
| Extraversion*                             | 3420     | 1520/1900            | 560476        | -              | -                 |
| Schizotypal personality*                  | 2386     | 1065/1321            | 560369        | -              | -                 |
| Mood disorder*                            | 2307     | 1040/1267            | 560318        | -              | -                 |

Samples were maximized for retention of cases to maximize the information available for each trait. There was no preferential selection of relatives in pairs for quantitative phenotypes, in order to retain the underlying distribution. All individuals involved in the datasets listed above were non-respondents to the GS follow-up study. Compared to individuals included at GS GWEIS (respondents in GS follow-up), non-respondents were significantly: younger, from more socioeconomically deprived areas, generally less healthier and wealthier. Non-respondents were more likely to smoke, and less likely to drink alcohol, although they consumed more units per week, compared with respondents. At GS baseline, non-respondents experienced more psychological distress and reported higher scores in symptoms of GHQ-depression and GHQ-anxiety than respondents<sup>57</sup>.

The total target sample size (N), number of males and females in N, number of SNPs (N SNPs) in target sample size N: the number of SNPs used as predictors after clumping step range between 90650 - 91000. The number of cases and controls in the independent target sample is indicated for binary phenotypes only. Samples were mapping by proxy approach was used (i.e. where first-degree relatives of individuals with the disease were considered proxy cases and included into the group of cases) are indicated by (R). \*Assessed through self-reported questionnaires.



Figure 1.

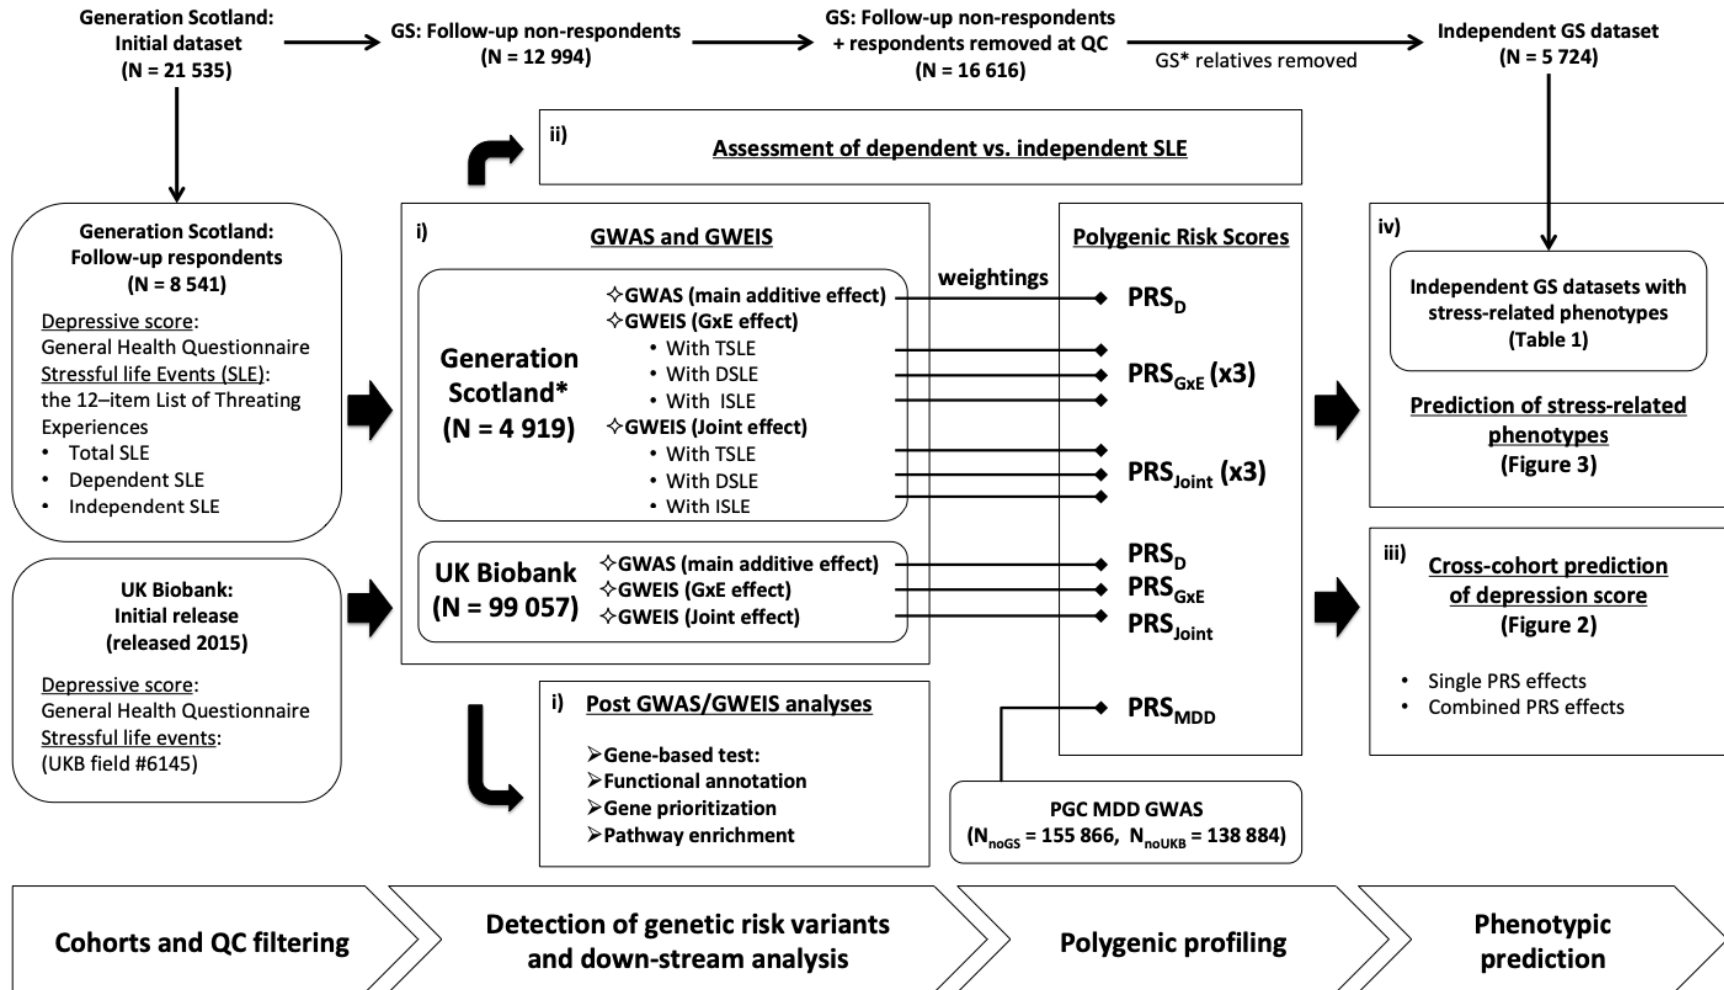

Figure 2.

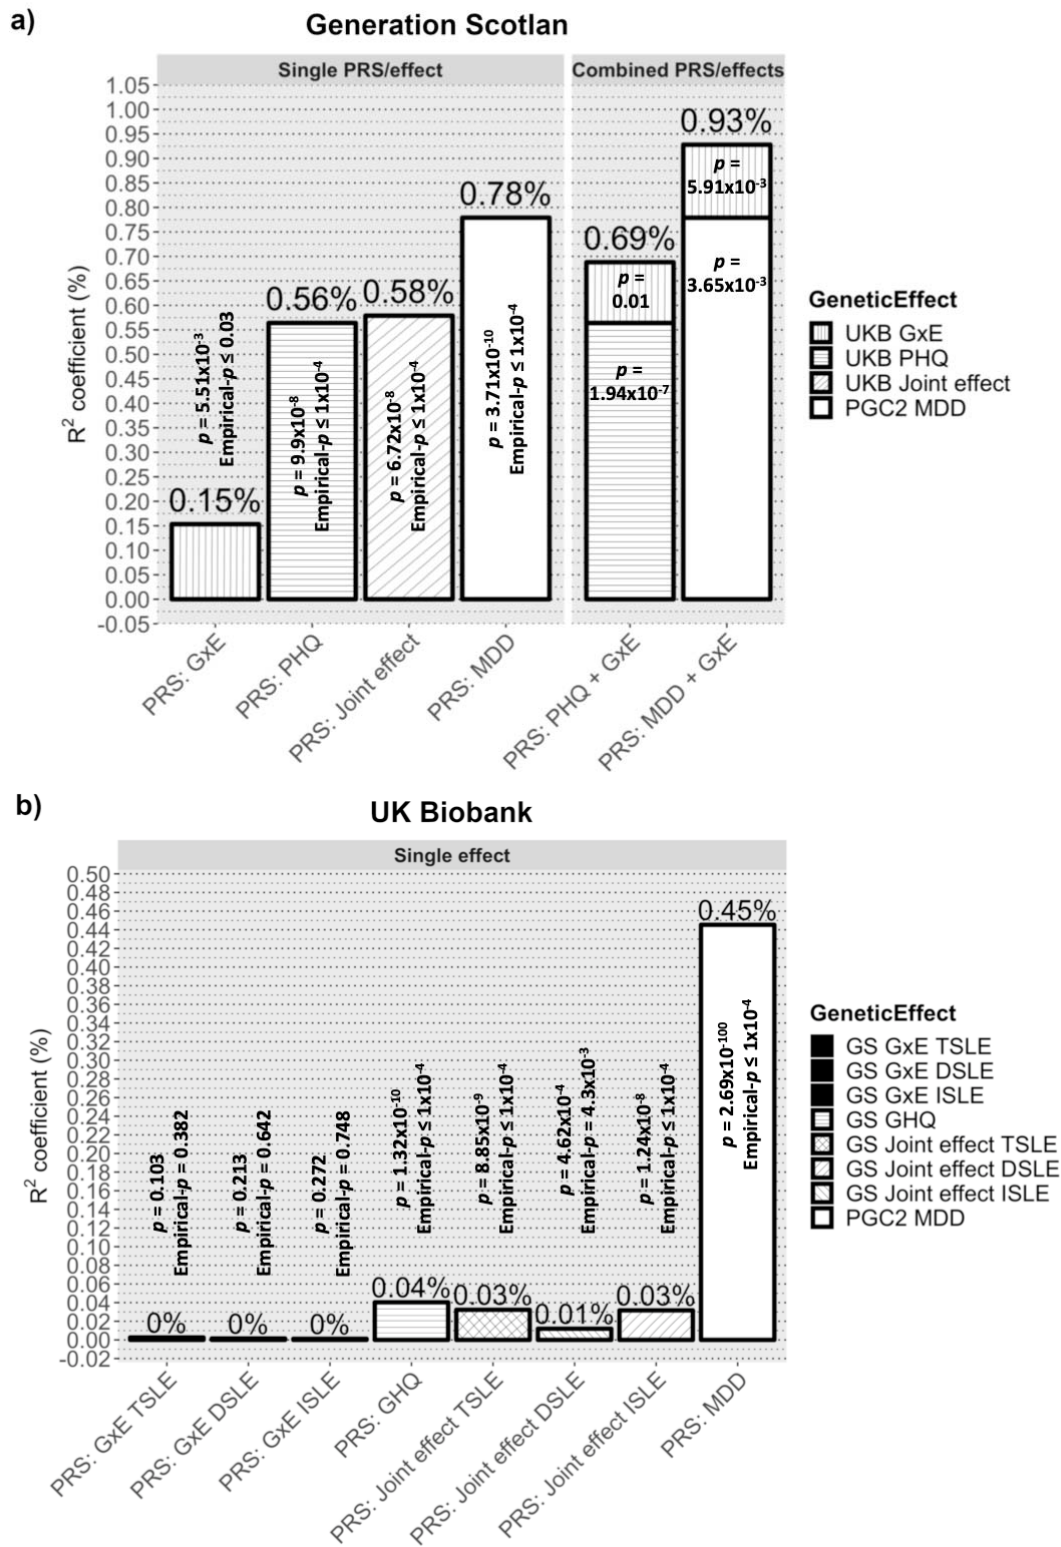

Figure 3.

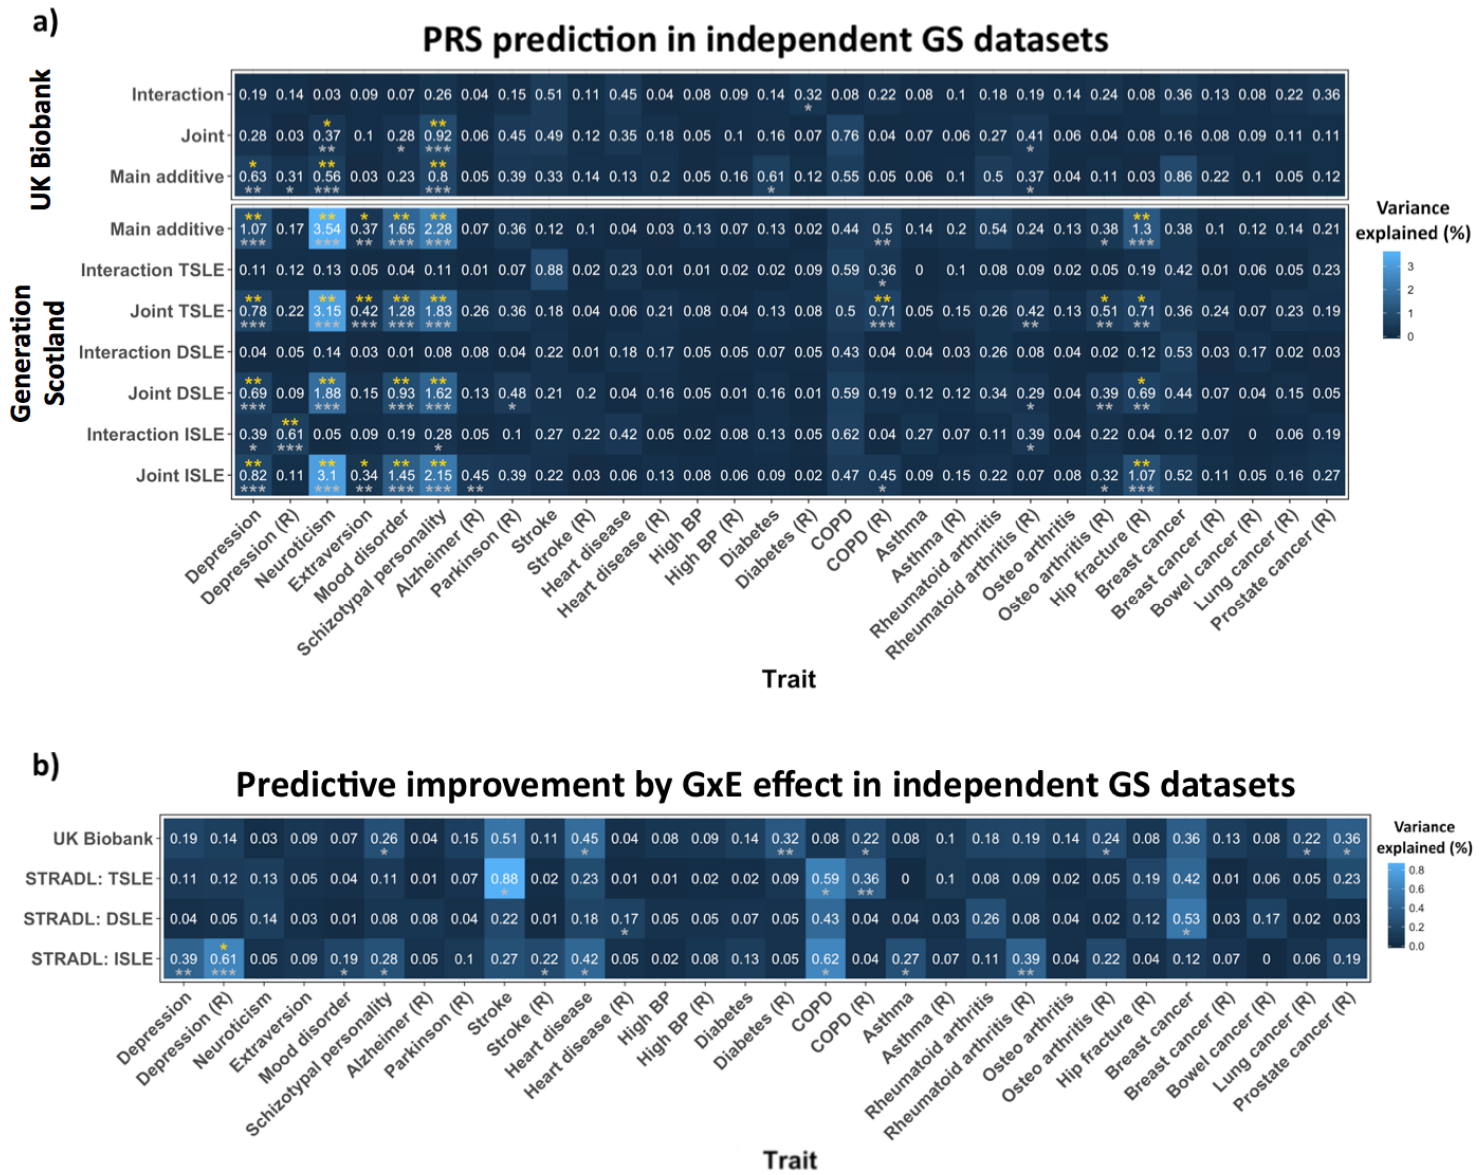

Source: https://biorxiv.org/content/biorxiv/early/2018/11/28/479691.full-text.pdf
